# Supplementary material for: A shape-memory temperature-responsive valve for directional liquid transport control
Source: Research Square preprint supplement (doi:10.21203/rs.3.rs-7995788/v1), 2025-11-20
Supplement: Supplementary file 1 [file f5a6d2755782c0c930bda36e.docx]

# Supplementary material

## Content list

1. Supplementary movie 1 TRV DLT behavior for water under on-state
2. Supplementary movie 2 TRV DLT behavior for water-ethanol mixture, concentration of 50% under on-state
3. Supplementary movie 3 TRV DLT behavior for water-ethanol mixture, concentration of 60% under on-state
4. Supplementary movie 4 TRV DLT behavior for water under off-state
5. Supplementary movie 5 TRV grid array DLT behavior of thermal patterning
6. Fig. S1 Basic geometry of elastic tube
7. Fig. S2 Nitinol phase change information tested by DSC
8. Fig. S3 Mechanical analysis of SMA in the TRV
9. Fig. S4 Steady and transient thermal analysis of TRV
10. Fig. S5 TRV geometric designing process and test
11. Fig. S6 Thermomechanical analysis for two-way shape change of TRV
12. Fig. S7 Methodology for constructing directionally inclined fin array
13. Fig. S8 Material surface characterization and contact angle measurement
14. Fig. S9 Experimental test device for DLT of compressed fin array
15. Fig. S10 Dynamic DLT measurement of compressed fin array
16. Fig. S11 DLT data of compressed fin array for directionality and velocity
17. Fig. S12 Dynamic liquid flow characteristic of off-state TRV
18. Fig. S13 Dynamic DLT behavior of TRV without fin array
19. Fig. S14 Dynamic DLT behavior of on-state TRV
20. Fig. S15 Effect of backward pinning in DLT behaviors of the TRV, mechanism verification
21. Fig. S16 Effect of contact angle on DLT behaviors of the TRV
22. Fig. S17 IR image of on-state TRV, thermal conditions with/without DLT
23. Fig. S18 Structural data of thermal cycle repeatability test
24. Fig. S19 Continuous DLT test of TRV with downstream liquid-suction rod as mass sink
25. Fig. S20 Continuous DLT test of TRV with downstream heating rod as mass sink
26. Fig. S21 Schematics for multifunction and multiform applications of TRV
27. Fig. S22 IR image of thermally regulated multi-directional valve
28. Fig. S23 Thermally regulated multi-directional valve, structure design and DLT data
29. Fig. S24 Schematic and IR image of multimode mixing circuit of TRV
30. Fig. S25 IR image of TRV grid array
31. Fig. S26 TRV grid array, schematic and data of thermal patterning paths
32. Fig. S27 Thermal actuation response and energy consumption analysis
33. Fig. S28 Benchmark comparison of representative DLT performance with thermal stimuli
34. Fig. S29 Experimental setup and instrumentation used for DLT testing

## Basic geometry of elastic tube


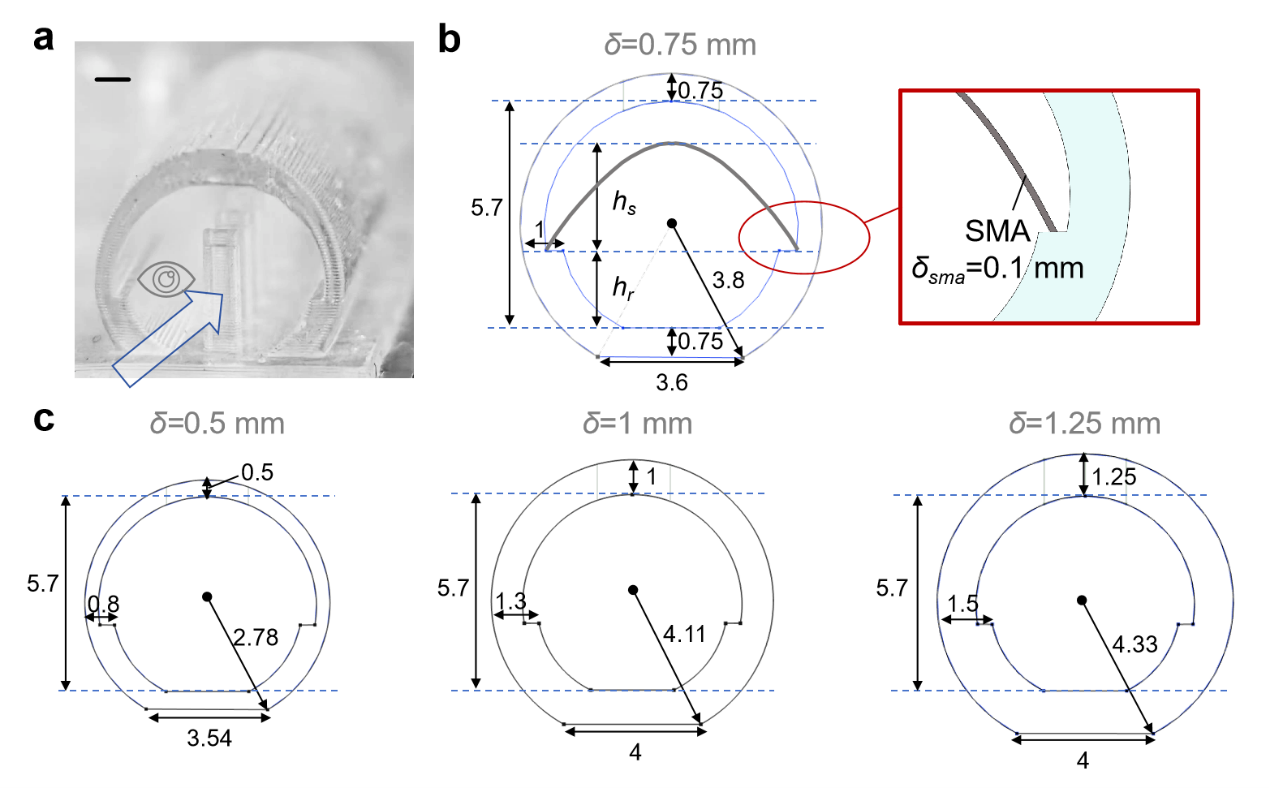


### Fig. S1 Basic geometry of elastic tube

**a** Real-world photograph and visual angle. The following figures show the cross-section of the tubes. Along the direction of the tube, the cross-section remains the same. Scale bar: 1 mm.

**b** The structural investigation chooses the design thickness () as the key mechanical parameter, which is also the thickness of top half of the tube. The bottom half is thickened for better structural stability and for offering an inner step for SMA edge to stand on. SMA thickness () is 0.1 mm, and thicker SMA cannot meet the mechanical equilibrium requirement.

**c** Detailed parameters of tubes with different . The inner cavity heights of elastic tubes are set the same as 5.7 mm.

**b** and **c** Length unit: mm.





### Fig. S2 Nitinol phase change information tested by differential scanning calorimetry (DSC)

## Mechanical analysis of SMA in TRV

**
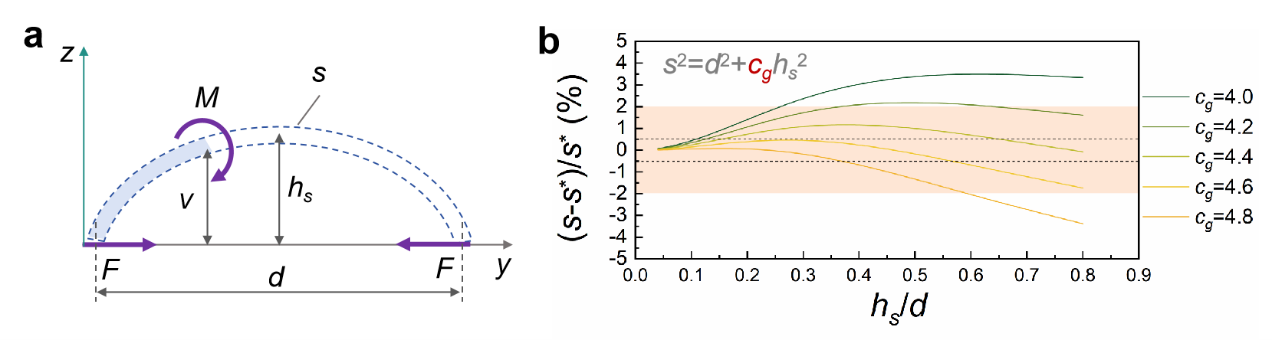
**

### Fig. S3 Mechanical analysis of SMA in the TRV

**a** Mechanical equilibrium relationship at different beam cross-sections using the sectional analysis. At certain position along the curved beam (), local defection () and the torque () define the beam shape, which approximates a sinusoidal profile.

**b** A simplified approach is used to estimate the SMA slice arc length () based on beam height () and width (). The empirical relationship is given by , where is a geometric coefficient. A value of 4.6 yields an arc lengthy estimate with a relative error below 2% compared to analytical solution ().

The SMA span and SMA height obey the relationship of Eq.S1, for is the elliptic integral of the second kind. The analytical solution is complex for practical use. Instead, an easier empirical expression is employed to estimate the relationship, i.e. . This equation provides a convenient basis for the structural parameter design in subsequent prototypes.

In Fig.S2, the curved beam, representing the SMA slice in the TRV cross-sectional view, is described by the deflection profile . At position, the force equilibrium of the local segment yields the governing equation Eq.S2.

where is the torque, is the Young's modulus, is moment of inertia, and is interaction force from elastic component. Herein, SMA slice is assumed to have a constant modulus . However, in practice, the modulus of SMA varies with local strain, complicating the derivation of a closed-form analytical solution. As a result, the deformation behavior can more easily solved in a numerical way. Nevertheless, both experimental observation and simulation confirm that the deflection profile is reasonably approximated by a sinusoidal curve, thus the empirical relationship is suitable.

## Thermal analysis of TRV

**
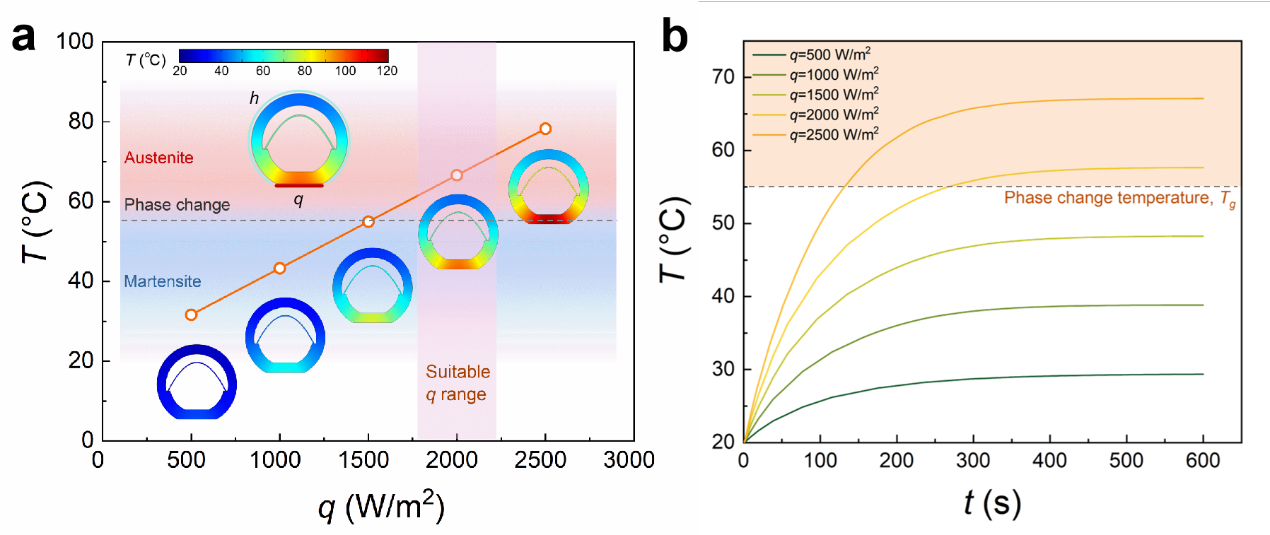
**

### Fig. S4 Steady and transient thermal analysis of TRV

**a** Relationship between the average steady-state temperature of SMA () in TRV and the applied heat flux () at the bottom surface. The operable heat flux range can be determined by the SMA phase transition temperature window (~55°C). The heat loss is calculated using natural convection with convective heat transfer coefficient () of 10 W/m2 K, and ambient air temperature is 20 ℃

**b** Transient heating process under different needs ~300 s to reach the steady state.

## Geometric design logic and process of TRV


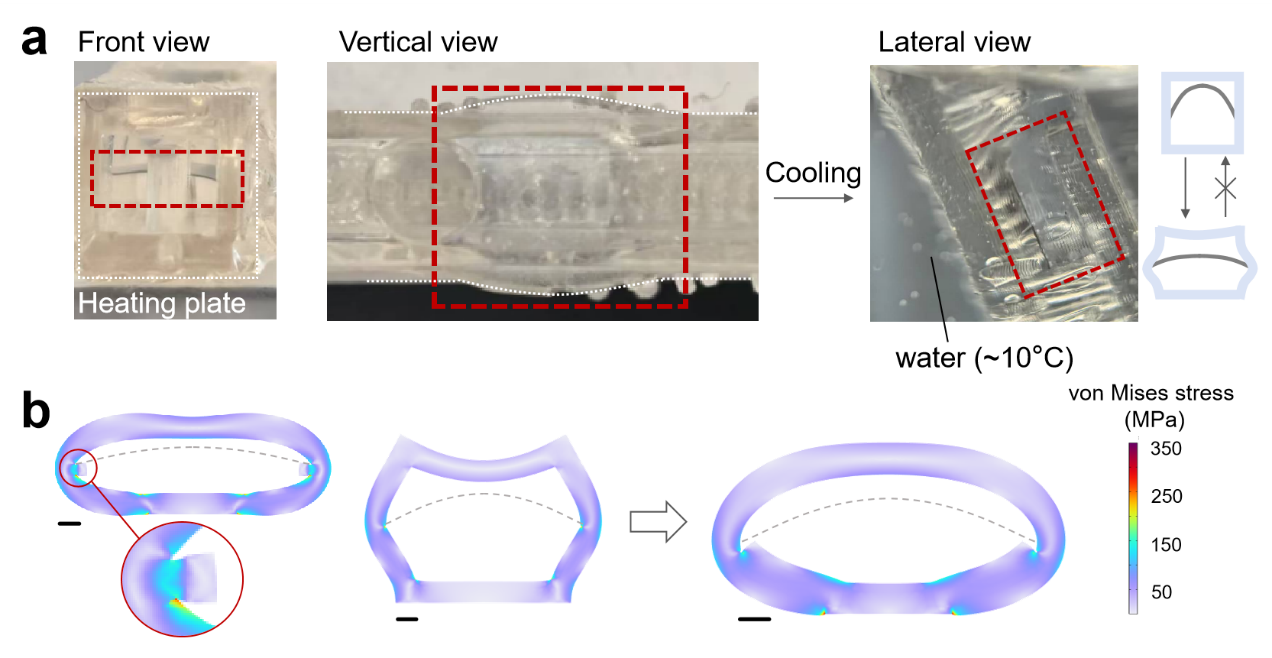


### Fig. S5 TRV geometric designing process and test

**a** After heating, SMA can stretch the elastic tube with square cross-section and compress the fin array within as expected. However, its shape recovery cannot be completely realized upon cooling. This is because the stress cannot be evenly distributed in the cross-section, which cannot correctly offer contraction force to press the SMA. This defect is inherent, thus square shape or shapes with multiple corners causing stress concentration is not applicable for TRV design.

**b** Mechanical analysis by Finite Element Method reveals the reasonability of TRV geometric design in this study. Compared with the square tube, von Mises stress in cross-section of round tube is larger and more evenly distributed, which ensures the potential energy for correct cooling contraction. Compared with the round tube with inner step that protrudes from the inner wall, the thickened wall can avoid local stress concentration and further damage.Scale bar: 1 mm, for each sub figures.

## Thermomechanical analysis for two-way shape change of TRV


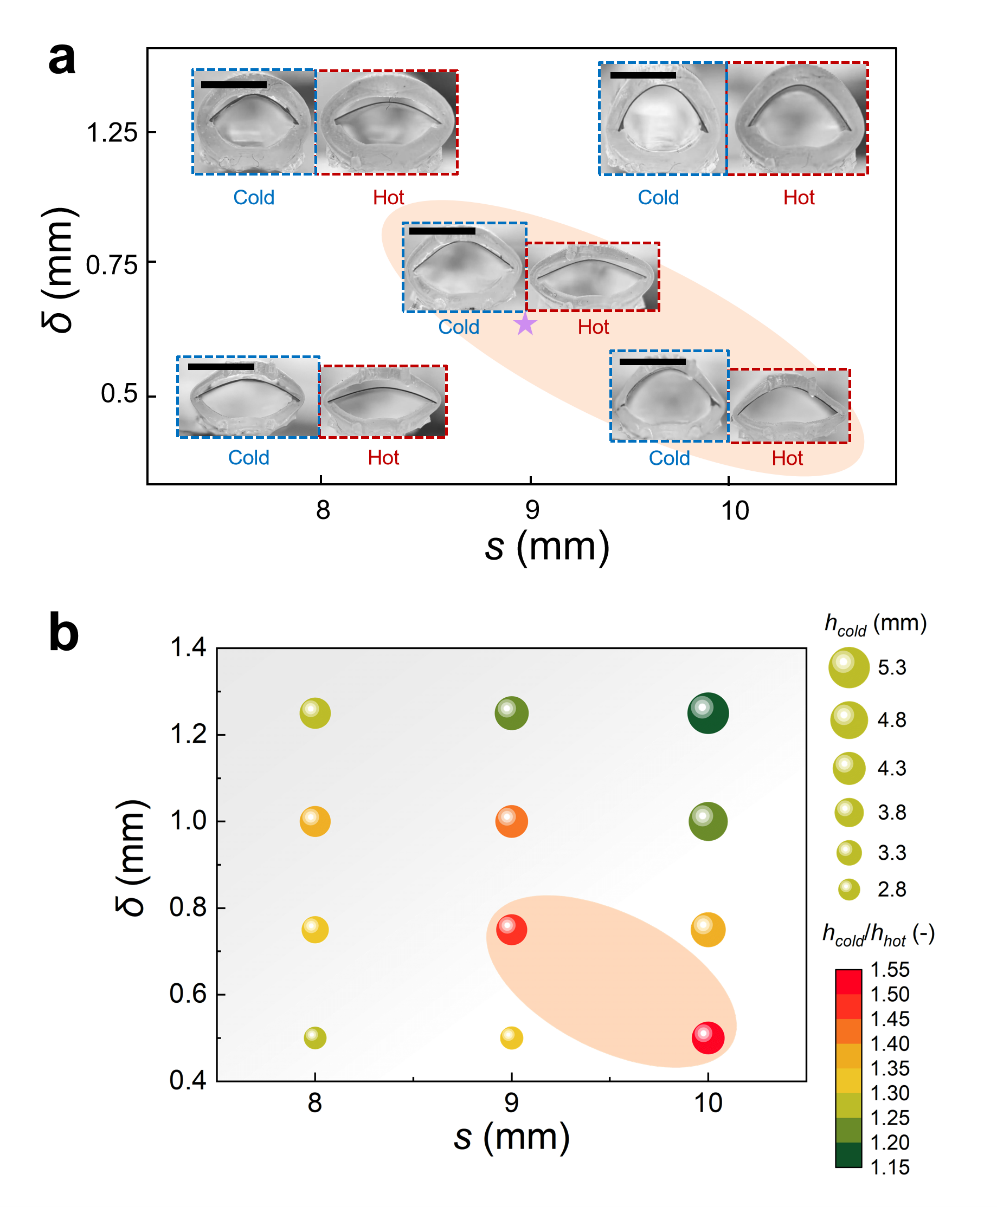


### Fig. S6 Thermomechanical analysis for two-way shape change of TRV

**a** Cross-section photographs of two-way shape change of TRV showing the flattening degree. Wall thickness () governs the outer tube wall shape, while arc length () governs the mechanical strength of SMA slice.Scale bar: 5 mm, for each sub figures.

**b** Measured inner cavity height () under cold and hot state at different and . The optimal parameter combination in the pale orange zone, corresponds to the highest thermal deformation reflecting by compression ratio (). Considering the mechanical strength, the optimal combination is 0.8 mm and 9 mm.

## Directionally inclined fin array, construction reasonability


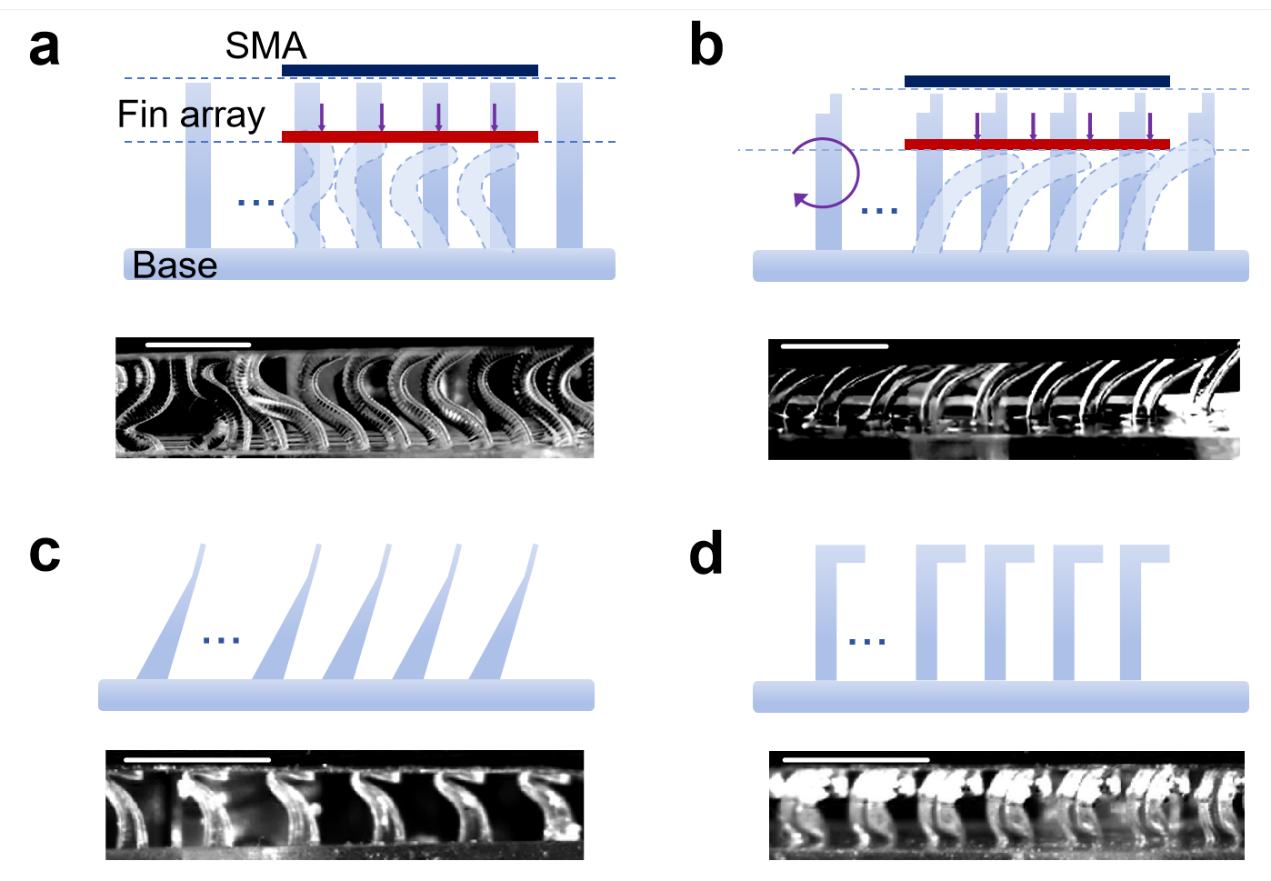


### Fig. S7 Methodology for constructing directionally inclined fin array

**a** Heated SMA provides with downward compression force for the fin array which is aligned with the middle of SMA arc. When the fin array with regular cubic shape is compressed, their inclination tends to be random, because the fabrication accuracy, flatness of compression surface, or fin interference. Stability of compressed fin also makes the fin curve conditions different when the compression extent varies.

**b** When the fin array with unbalanced surface (a concave notch at the fin tip) is compressed, the force applies a moment on the fin body and makes the fin array directionally inclined in the process of increasing compression extent.

**c** The compression situation for the fin array with triangle shape and additional protrusion. The inclination extent is insufficient, and the direction is reversed.

**d** The compression situation for the fin array with cubic shape and additional protrusion. The inclination extent is insufficient, and the deformed shape dissatisfies the requirement. Overall, the shape in **b** is adopted for TRV design because of regular and controllable deformation.

**a**-**d** Scale bar: 5 mm.

## Material surface characterization and contact angle measurement


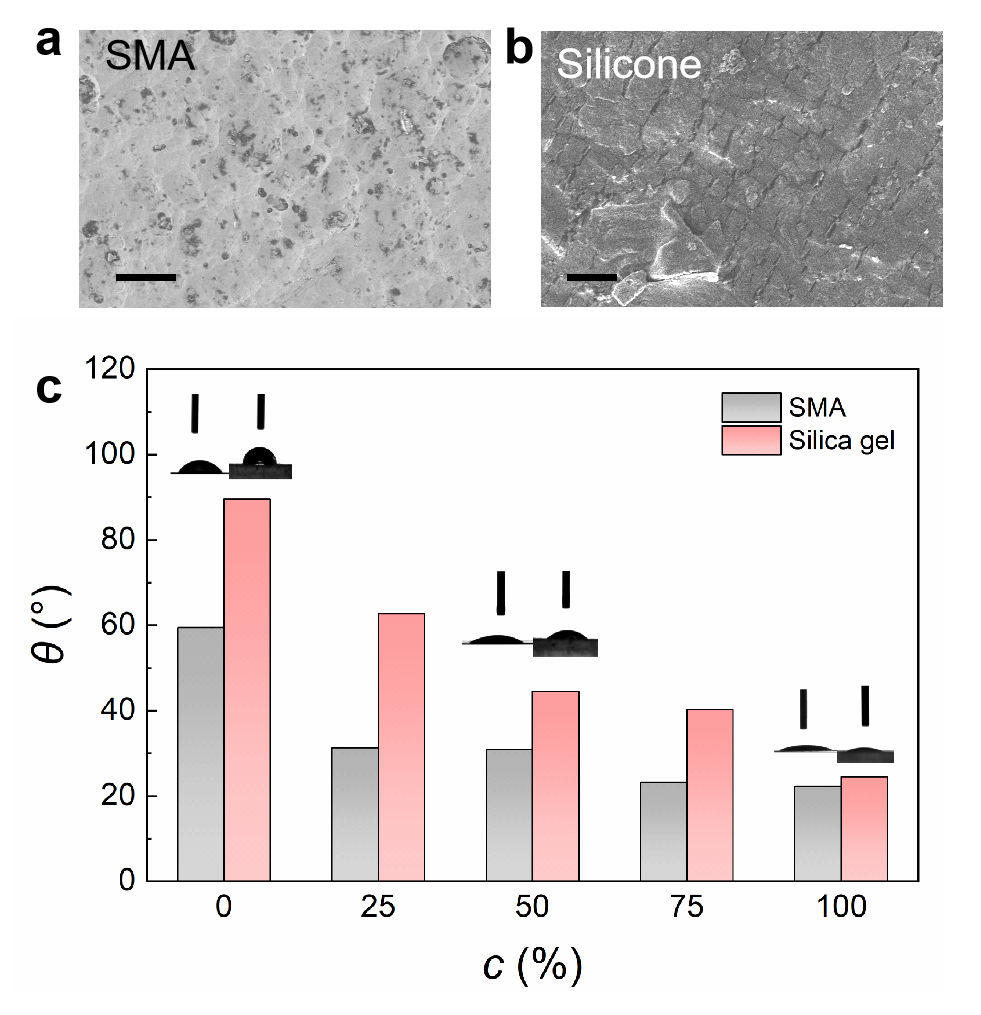


### Fig. S8 Material surface characterization and contact angle measurement

**a** Scanning electron microscope (SEM) image of SMA surface. Scale bar: 20 μm.

**b** SEM image of silicone surface. Scale bar: 10 μm.

**c** Contact angles () of ethanol-water mixtures with different concentrations () on SMA and silicone surfaces.

## Experimental test device for DLT of compressed fin array without tube


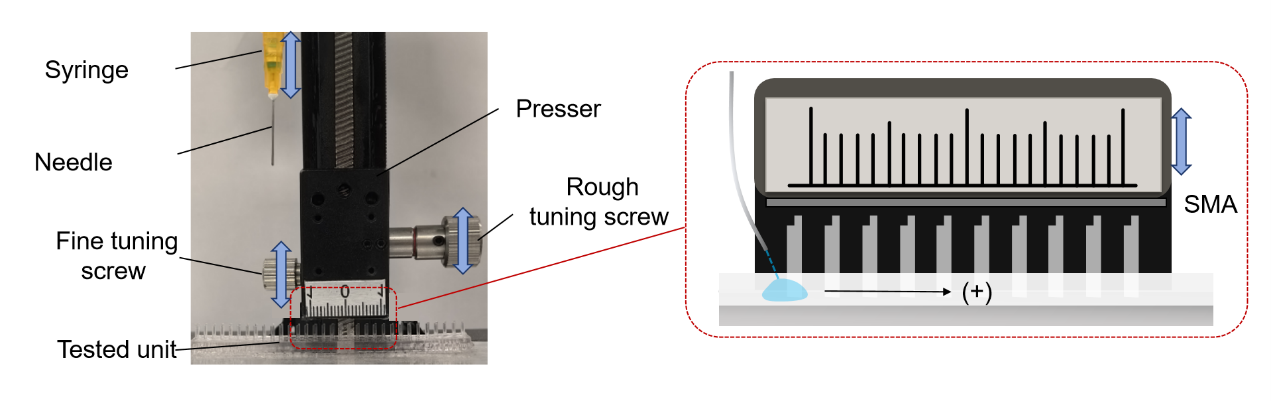


### Fig. S9 Experimental test device for investigating DLT of compressed fin array

## Dynamic DLT measurement of compressed fin array











### Fig. S10 Dynamic DLT measurement of compressed fin array

**a**-**d** Results for water-ethanol mixture concentration=0, 25%, 50%, and 75% under different absolute compression extent (), respectively. Reverse liquid transport exists when i) =0 and =25%, ii) =0 and =50%, iii) =0 and =75%, iv) =1.5 mm and =75%. Symmetric fin structure causes directional wetting ineffective. Smaller liquid contact angle also may dissatisfy the directional wetting condition.


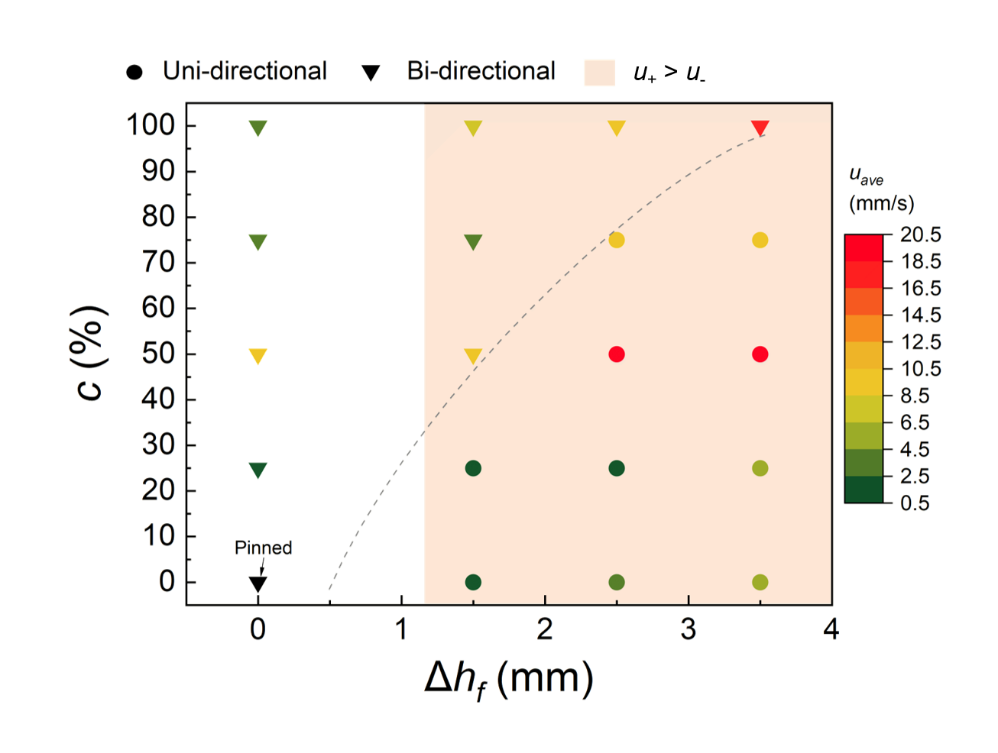


### Fig. S11 DLT data of compressed fin array for directionality and velocity

Effects of compression extent () and ethanol-water mixture concentrations () on average DLT velocity () and transport directionality. For 1.5, even though liquid transport is bi-directional, the forward velocity () is obviously larger than the reverse velocity () because of the impact from compressed fin array. The maximum reaches ~20.5 mm/s. Larger tends to occur: i) for mixtures of larger with lower surface tension and viscosity, ii) for larger , the volume of vacant spacings gets smaller that tolerates less liquid to pass through. Bi-directional transport tends to distracts the flow in two directions, reducing as the result.

## Dynamic DLT behavior of TRV and comparative studies


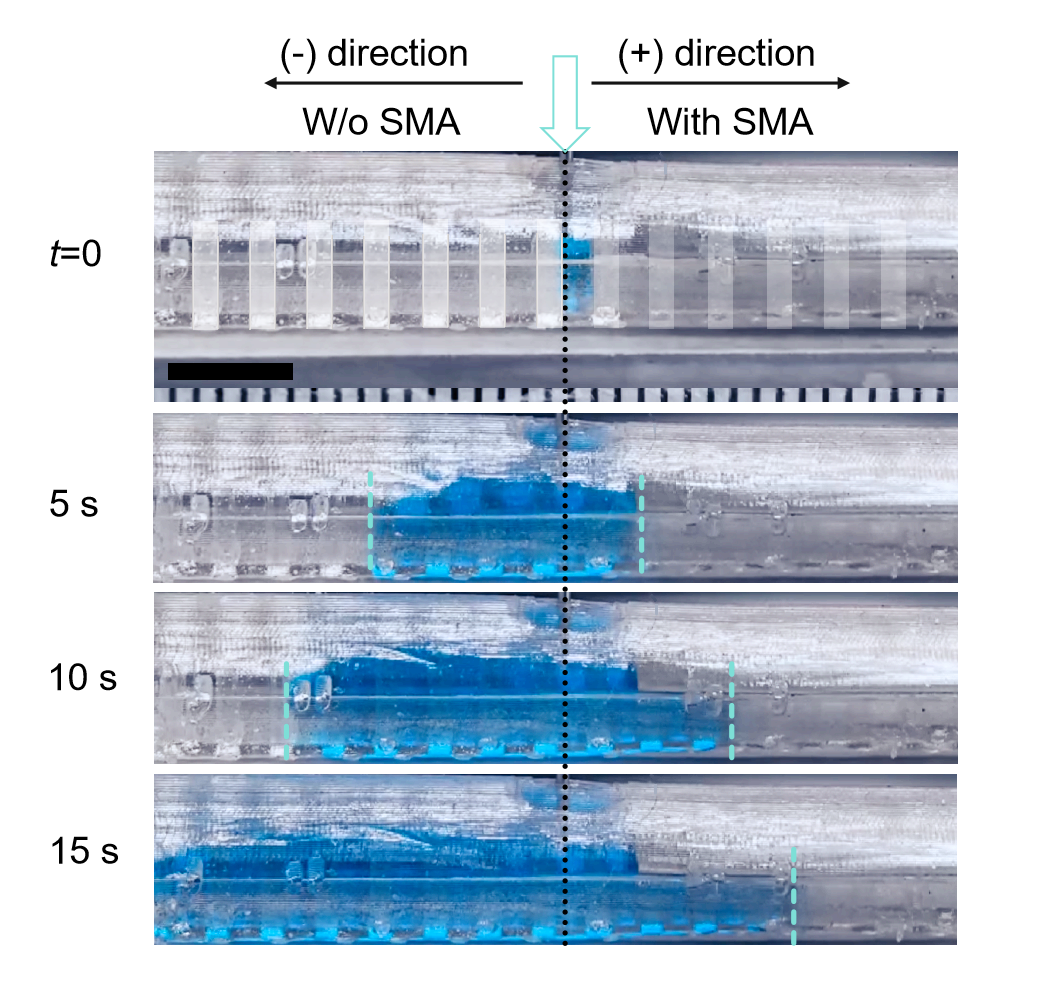


### Fig. S12 Dynamic liquid flow characteristic of off-state TRV

The (+) direction is defined as the side of TRV with SMA. The fin array is vertical due to lack of compression. The motion of liquid is not driven by external force, but is due to continuous injection, thus the phenomena cannot be reckoned as DLT. The dynamic liquid flow result indicates a bi-directional feature with a larger transport velocity toward the (-) direction. This behavior may be because the slightly deformed inner cavity increases the transport resistance. Scale bar: 5 mm.


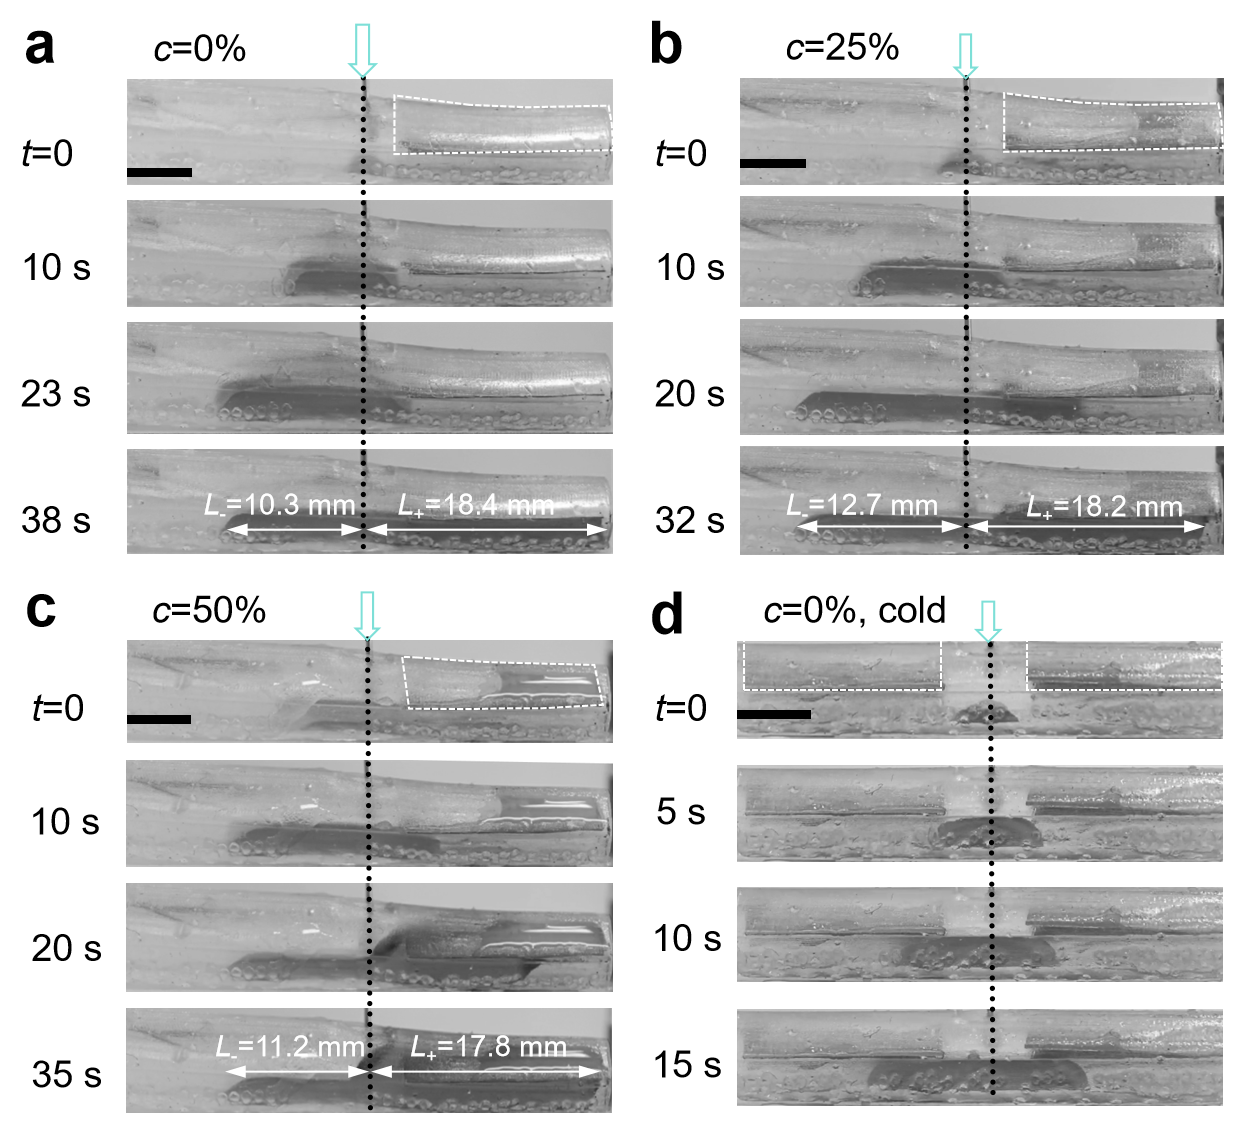


### Fig. S13 Dynamic DLT behavior of TRV without fin array

**a**-**c** Results for dynamic DLT behavior of on-state TRV without fin array for varied water-ethanol mixture concentration (). The ratio between forward transport distance () and reverse transport distance () is around 1.43 - 1.78 less than 2.5. And the rear meniscus of liquid is not pinned, therefore, TRV without fin array lacks the functionality of uni-directional liquid transport, indicating that fin array is the most important component for DLT control of TRV.

**d** Results for dynamic liquid flow characteristic of off-state TRV without fin array. Its each side is assembled with SMA. The liquid floods and flows symmetrically inside the tube upon continuous injection.

**a**-**d** Scale bar: 5 mm


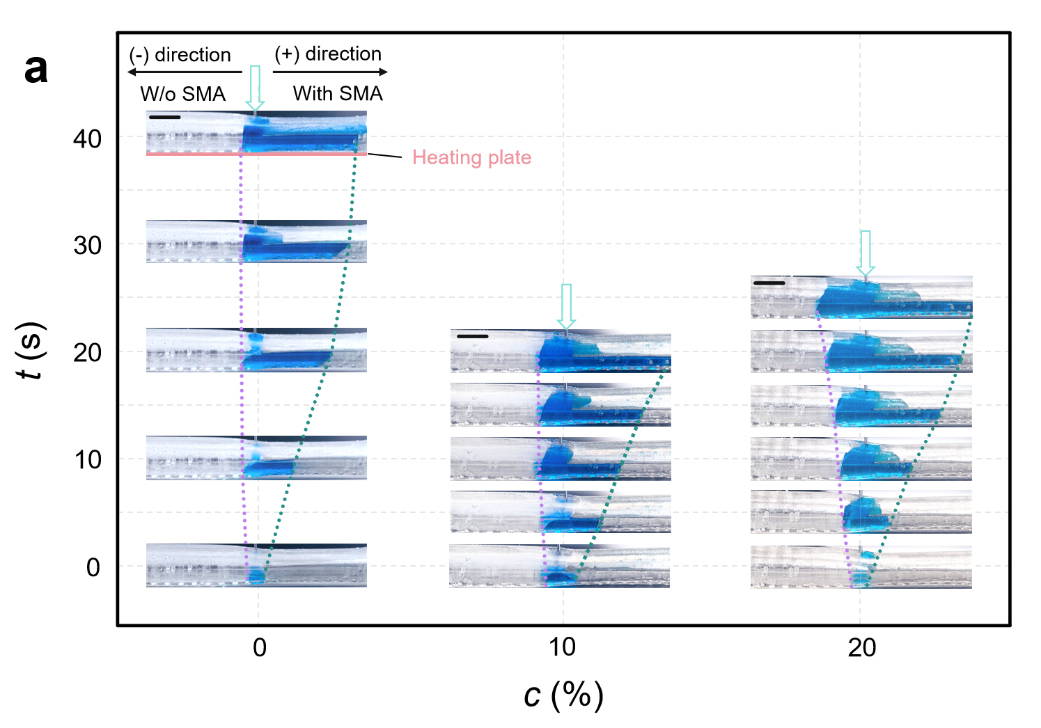

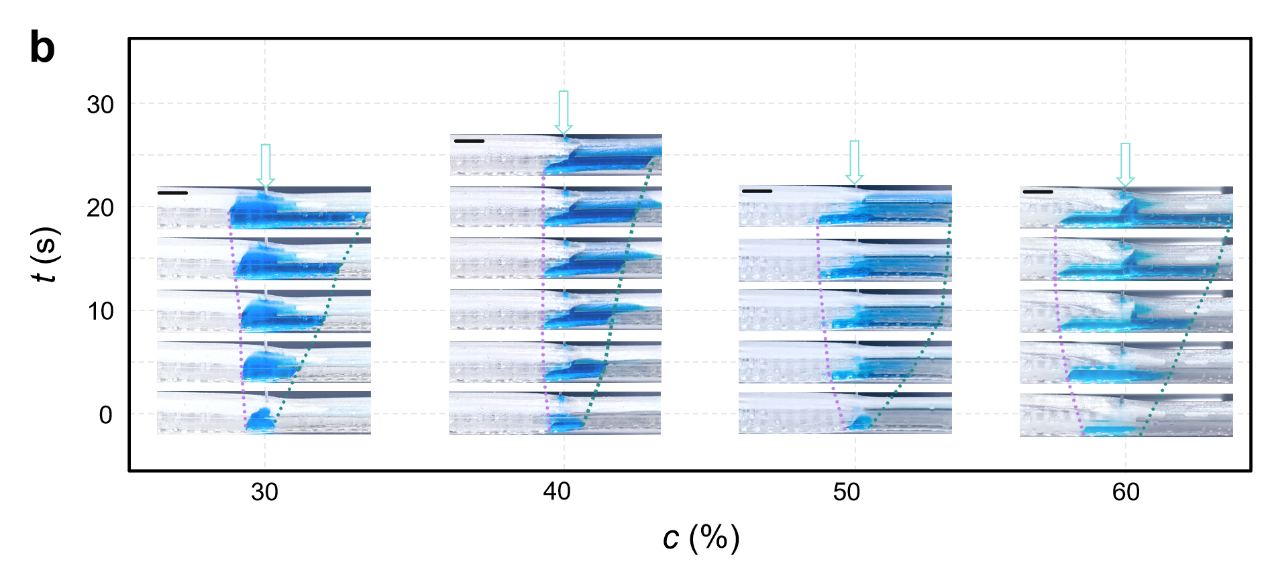


### Fig. S14 Dynamic DLT behavior of on-state TRV

**a** and **b** Results for dynamic DLT behavior of on-state TRV for varied water-ethanol mixture concentration (). The ratio between forward transport distance and reverse transport distance exhibits a decreasing trend, indicating DLT tends to be bi-directional. The velocity is lowest for pure water, and is relatively similar for the other mixtures, which may be because the balance between liquid property and directionality. An obvious cut-off exists between 50% and 60%.

**a** and **b** Scale bar: 5 mm, for each sub figures.





### Fig. S15 Effect of backward pinning in DLT behaviors of the TRV, mechanism verification

Based on experimental results, backward pinning shows different fin number () varying with mixture concentration (). This value in the proposed theory should nearly equal the ratio of Laplace pressure on the rear meniscus () and pinning force of each fin () due to the force equilibrium relationship.

The pinning force of each fin is [1]:

where is the fin width, =1 mm.

Similarly, the Laplace pressure on the rear meniscus can be expressed as

where is the characteristic width of meniscus, , is the tube bottom width, and is the SMA span distance. Herein, 2.4 mm, 6.1 mm.

## Effect of contact angle on DLT behaviors of the TRV


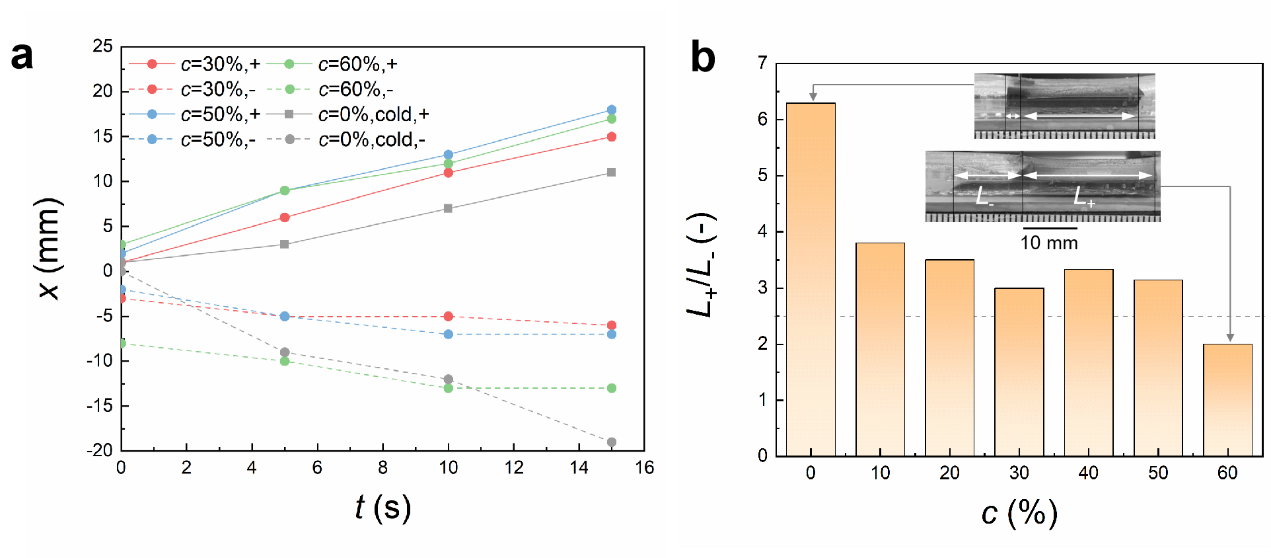


### Fig. S16 Effect of contact angle on DLT behaviors of the TRV

**a** Transient DLT behaviors of ethanol-water mixtures with varying concentrations () in TRV injected at a volumetric rate of 15.9 μL/s. The position of the advancing liquid front () is plotted over time (), where the sign of indicates directionality (positive for forward transport). In cold off-state of the TRV, there is no obvious pinning in either direction. In hot on-state, mixtures of 50% exhibit stronger uni-directional propagation, characterized by forward transport and reverse-direction pinning. In contrast, mixtures of 60% exhibits near bi-directional transport.

**b** Limited SMA slice length () leads to the final-state liquid transport distance in reverse direction (). The ratio reflects the unidirectionality of the system and varies with concentration , A cut-off value of 2.5 is used to distinguish between uni-directional and bi-directional transport. The minimum suitable contact angle () for uni-directional liquid transport is ~45° corresponding to 50%.


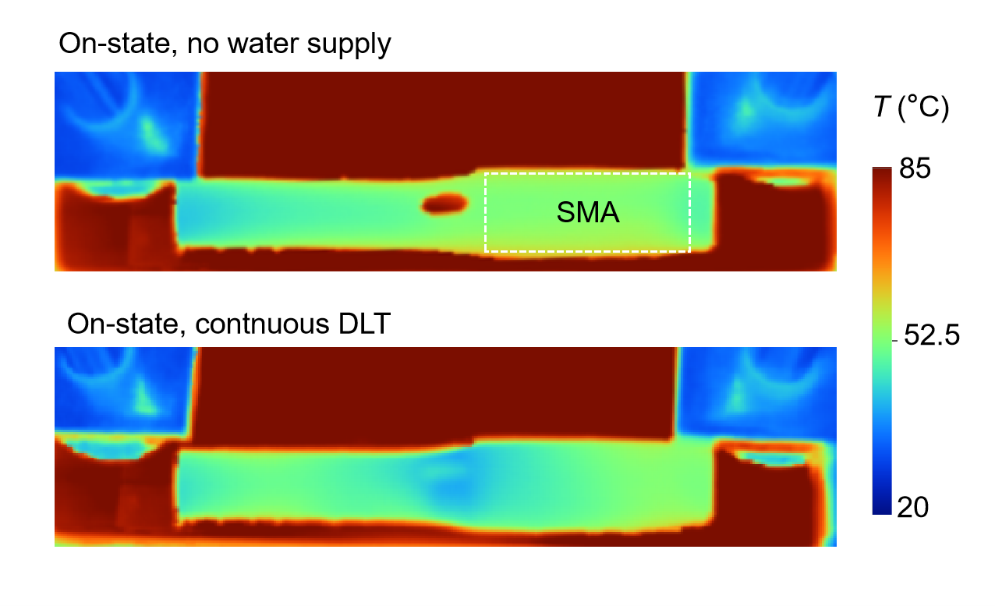


### Fig. S17 IR image of on-state TRV, thermal conditions with/without DLT

The DLT behaviors described herein are also seen in Supplementary movie 1 - 4.

## Thermal cycle repeatability test, structural measurement





### Fig. S18 Structural data of thermal cycle repeatability test

## Downstream condition independency analysis


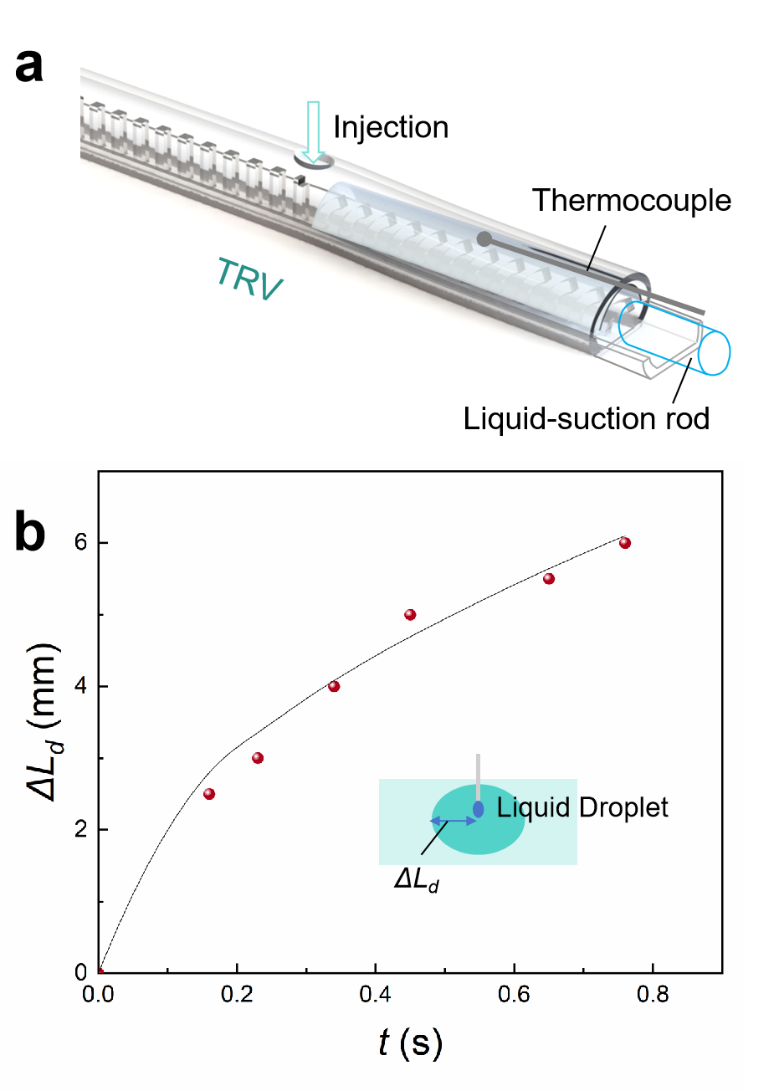


### Fig. S19 Continuous DLT test of TRV with downstream liquid-suction rod as mass sink

**a** Test device schematic. The thermocouple is attached to the upper surface of SMA.

**b** Liquid-suction rod is consisted of cotton weaved cloth. The test sample is tape with thickness of ~0.1 mm. The volumetric injection rate is ~19 μL/s. The linear relationship of the square of transport distance () and time () can use the Washburn relationship to calculate the capillary force . Therefore, the effective capillary force of this downstream mass sink has the magnitude of 10-3 N.


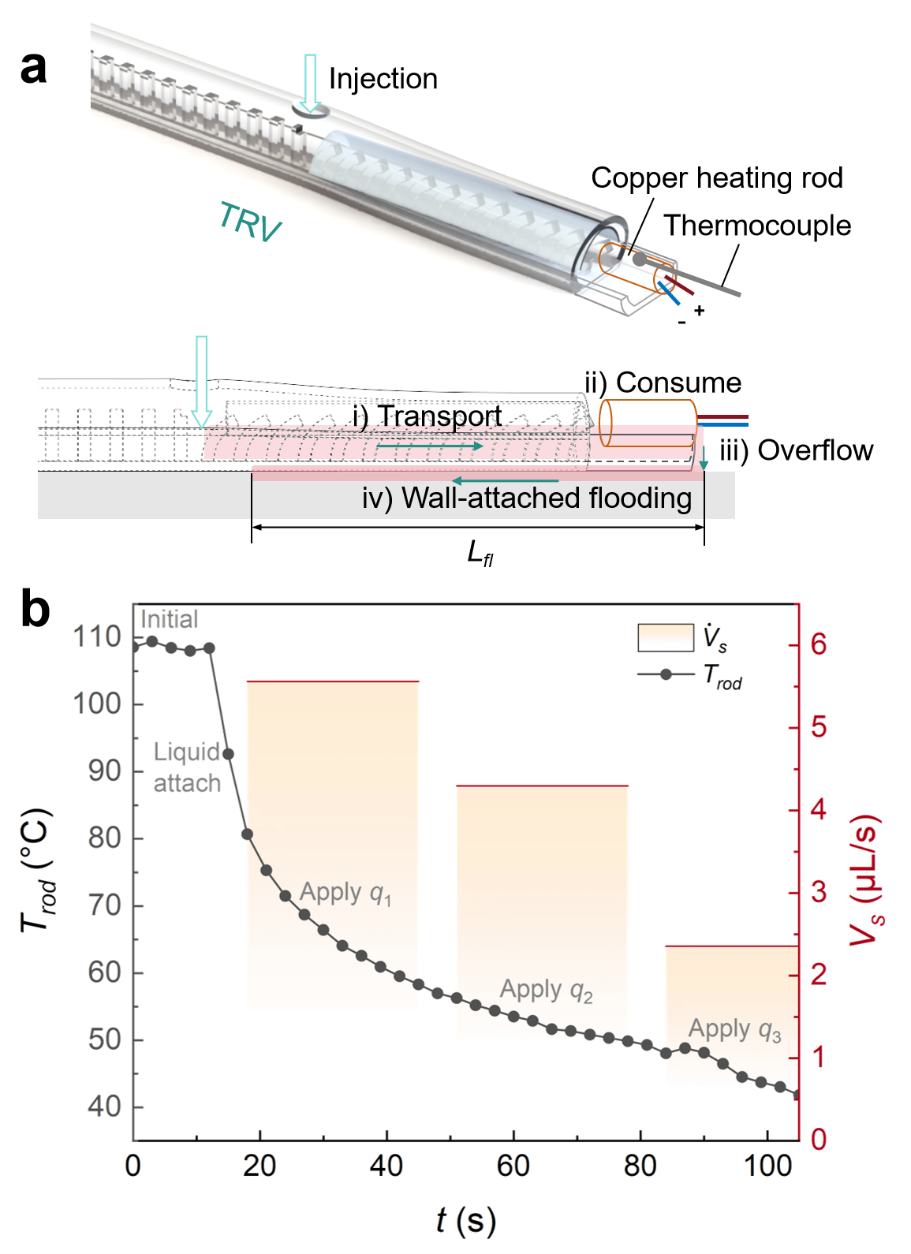


### Fig. S20 Continuous DLT test of TRV with downstream heating rod as mass sink

**a** Test device schematic. The thermocouple is attached to the surface of heating rod. The heating rod is connected to the power source to generate Joule heat. The continuous DLT process includes the following steps: i) transport, ii) consume through boiling, iii) overflow due to boiling disturbance and insufficient consumption, iv) wall-attached flooding.

**b** The collected thermal data () and estimated interface volume rate of evaporation () at three stages applying different heat flux ().

The estimated interface volume rate of evaporation (or liquid consumption rate of the mass sink) is obtained from the following equation:

where is the effective evaporation area, is liquid density, and is evaporation latent heat.

According to the classic RPI model [2] and the bubble departure diameter relationship [3] from Fritz et al., the boiling has the characteristic parameters as follows, is the bubble departure diameter, is the bubble departure frequency:

where is the contact angle, is surface tension, is gravitational acceleration, and is vapor density. The bubble departure velocity can be estimated by the following equation:

This velocity can also be regarded as the liquid phase refilling velocity in quenching process. According to the bubble force analysis, the liquid phase is affected by the reacting force from vapor phase. This effective quenching force can be derived as:

where is interface mass rate of evaporation. In conclusion, the magnitude of is 10-8 -10-7 N <<. These two mass sinks mentioned above have significant differences both in microscale driving force and macroscale disturbance.

## Multifunction and multiform applications of TRV — thermal conditions and dynamic DLT behaviors


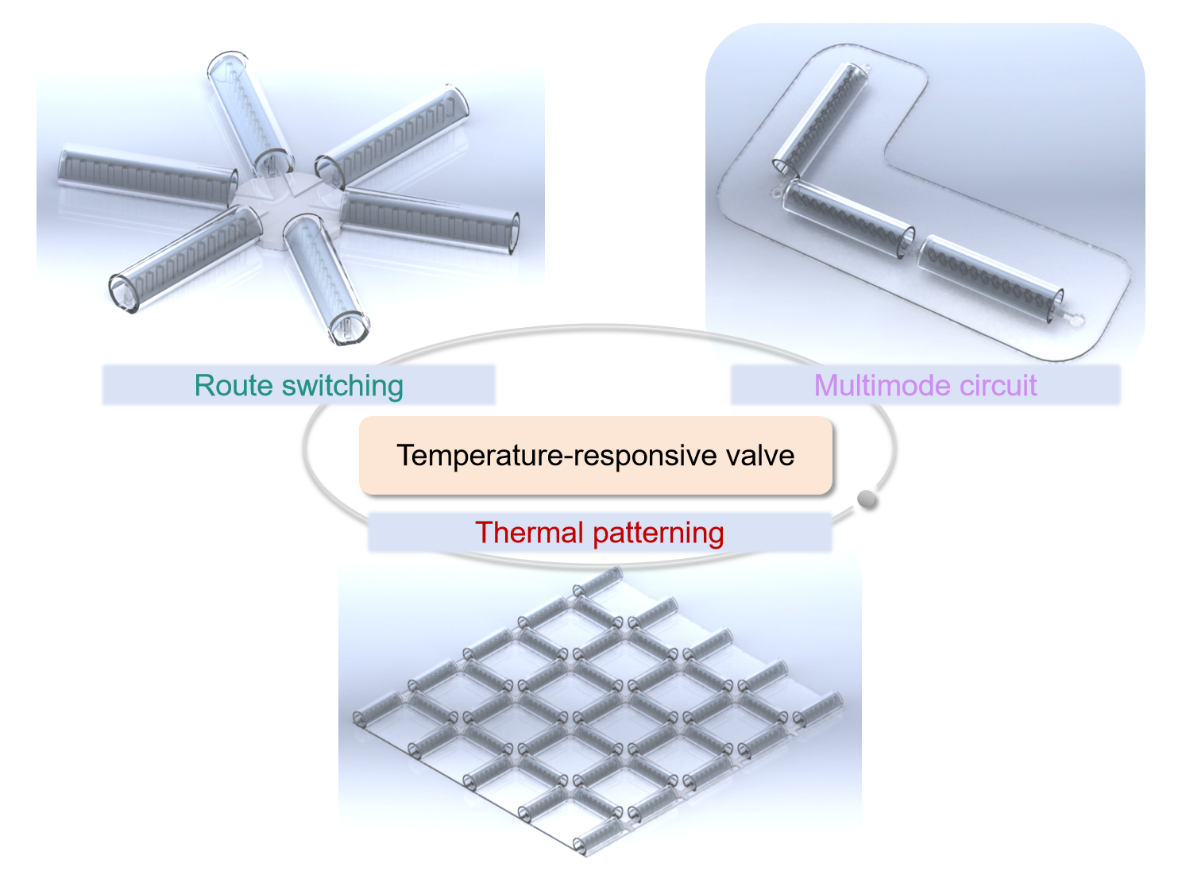


### Fig. S21 Schematics for multifunction and multiform applications of TRV


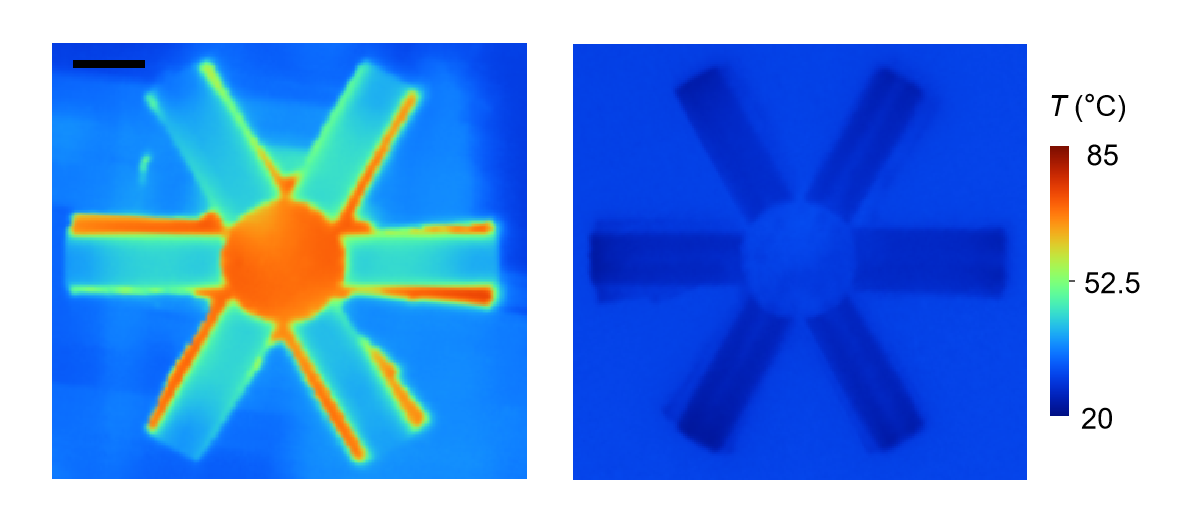


### Fig. S22 IR image of thermally regulated multi-directional valve

The left figure is heated and at an on-state. And the left figure is cooled and at an off-state. Each TRV positioned at the arm of thermally regulated multi-directional valve is assembled with SMA. Scale bar: 10 mm.


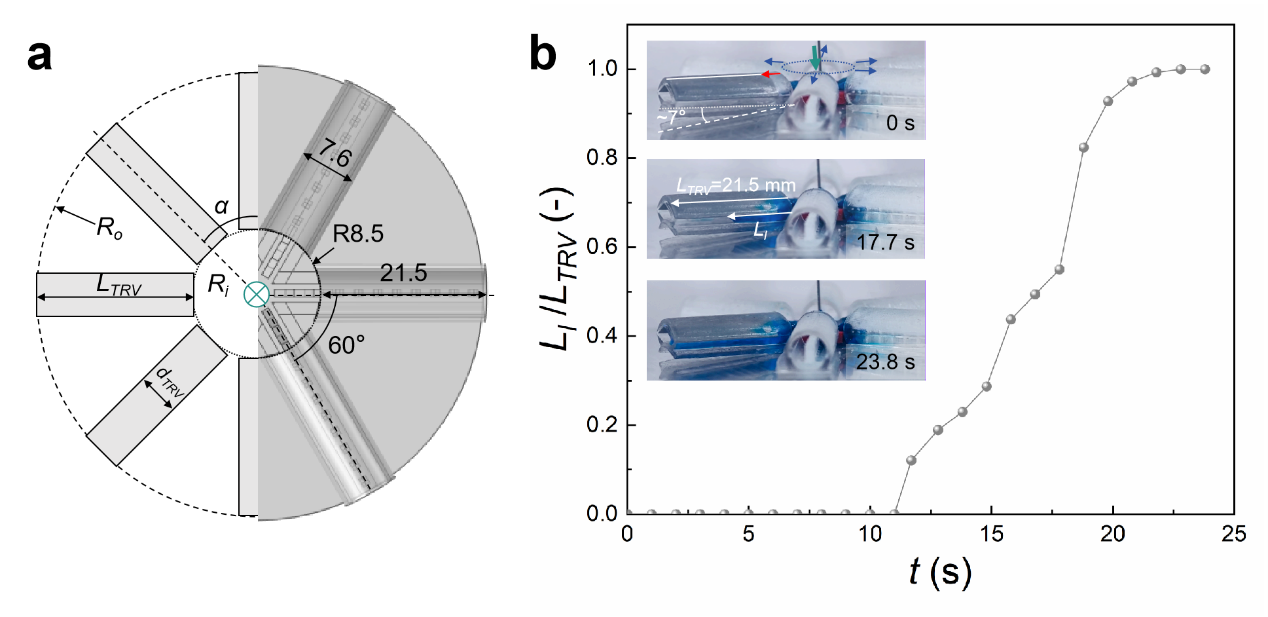


### Fig. S23 Thermally regulated multi-directional valve, structure design and DLT data

**a** The left half is the geometry adopted in this study, and the middle section is reserved for placing a manifold that separates liquid toward multiple directions with only certain directions flowing through. Length unit: mm. The right half shows more general situation for constructing a thermally regulated multi-directional valve. The important parameters are separation angle (), TRV length (), and TRV width (). The total width cannot surpass the inner round of radius . And the occupied space is defined by the outer radius .

**b** The DLT data for thermally regulated multi-directional valve when only single TRV is at on-state. Herein, the device is preheated. Even though the base is fixed which leads to ~7° upward bent of the TRV, the DLT performance still maintain overcoming gravity. In 0 - 10 s, the liquid has no movement due to the filling process of central manifold.


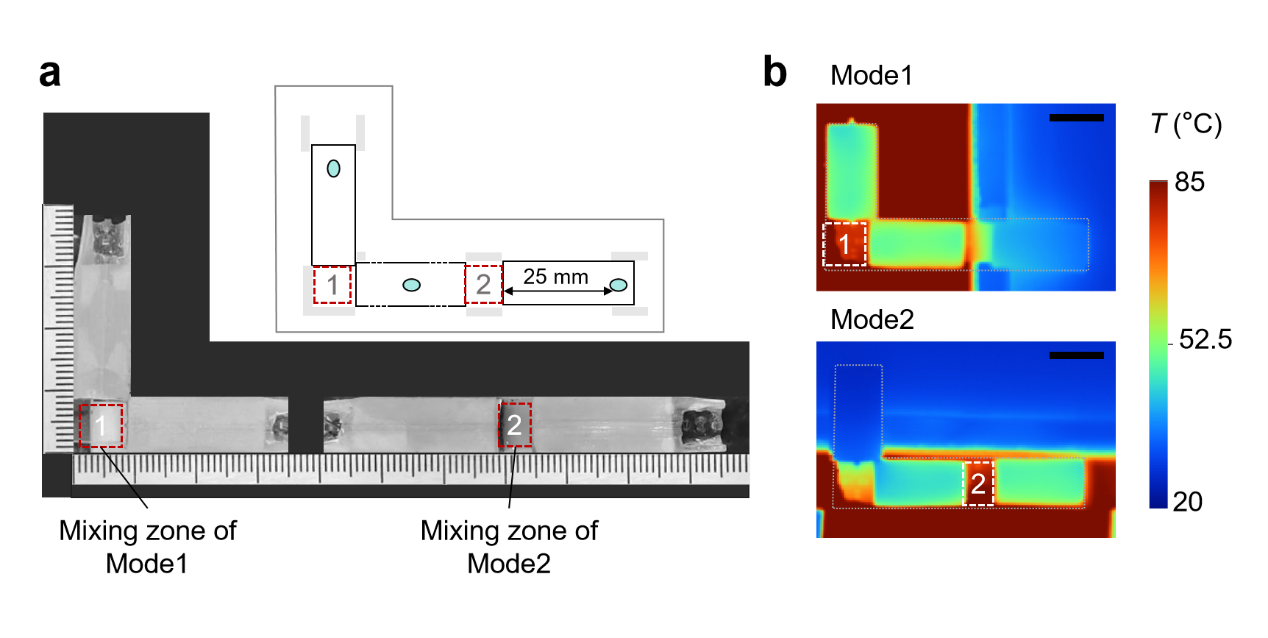


### Fig. S24 Schematic and IR image of multimode mixing circuit of TRV

**b** Scale bar: 10 mm


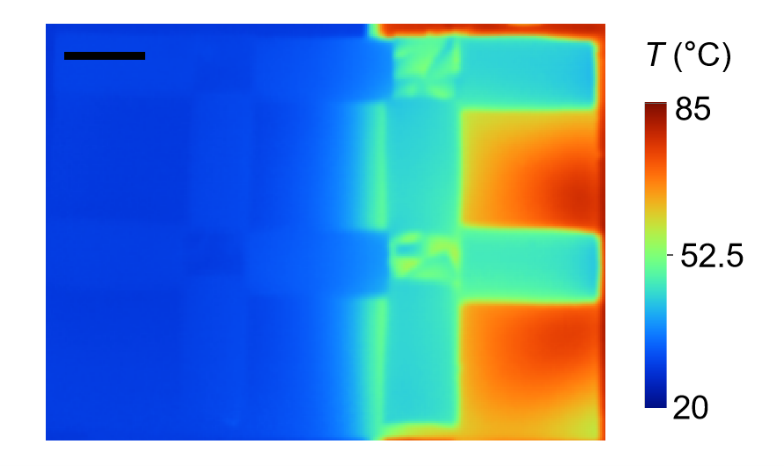


### Fig. S25 IR image of TRV grid array

The right side is heated while the left side is not. Each TRV is assembled with SMA. Scale bar: 10 mm.


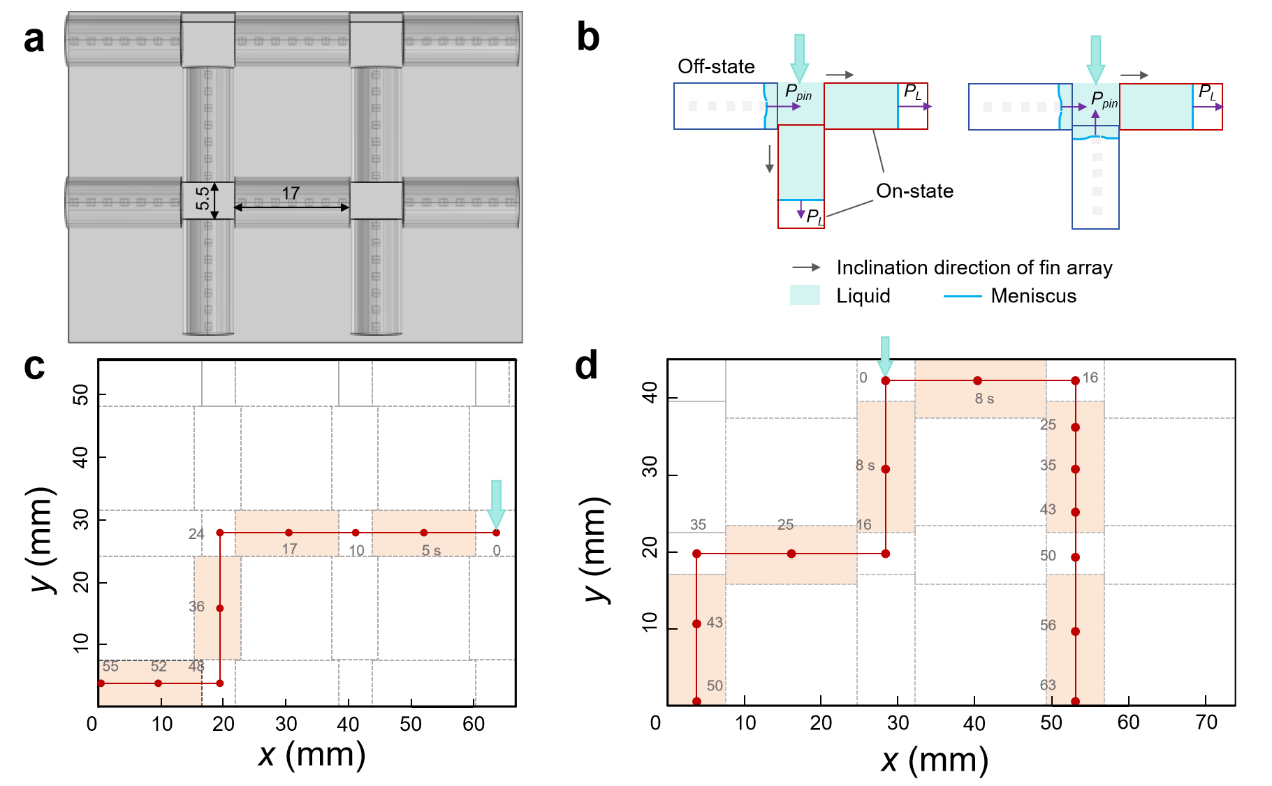


### Fig. S26 TRV grid array, schematic and data of thermal patterning paths

**a** Basic arrangement schematic. Length unit: mm.

**b** DLT mechanism of TRV grid array at different turnings. The main difference between branching and 90°-turning is the number of driving force and pinning force.

**c** and **d** Detailed time-dependent data of advancing meniscus position. The gray numbers in figures are the corresponding time. **c** and **d** are for pattern1 and 2 in thermal patterning, respectively.

## Thermal actuation and energy consumption


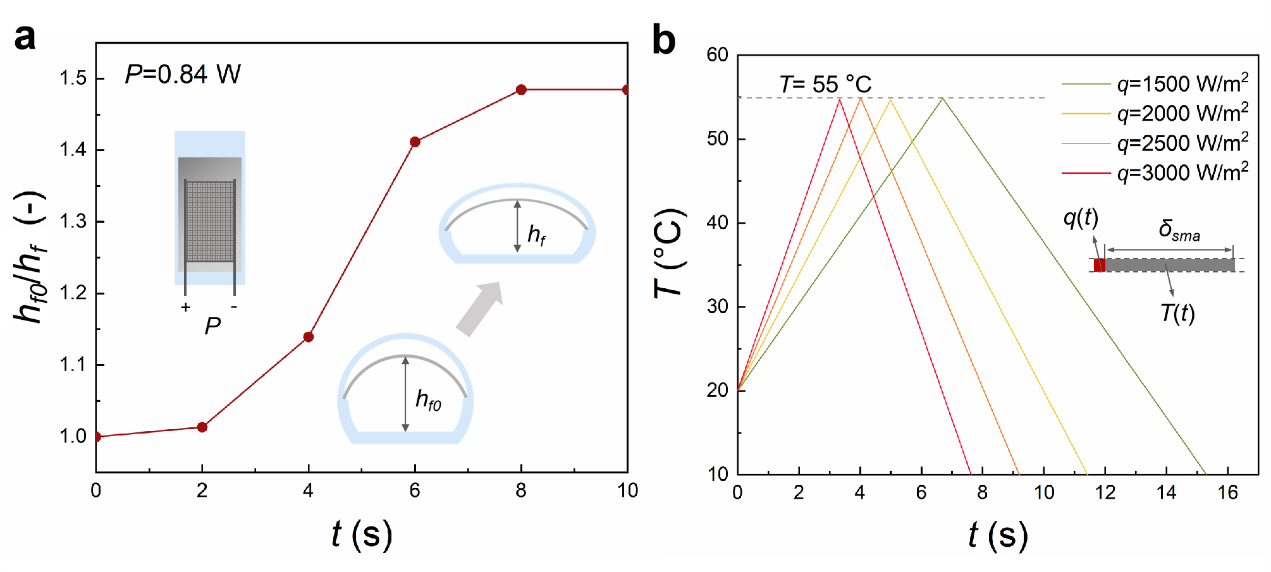


### Fig. S27 Thermal actuation response and energy consumption analysis

**a** Experimental demonstration of thermal actuation in the TRV. The SMA slice is directly attached to a micro heating mesh with an effective heating area of ~7 mm2. The applied heating power () is 0.84 W, representing the thermal actuation energy input. The thermal deformation is quantified by the compression ratio , where is the initial fin height and is the compressed height. The measured actuation time under this condition is ~8 s.

**b** Theoretical simulation of a 1D ideal thin-wall SMA element subjected to a full heating-cooling cycle. The thin wall has a thickness () of 0.1 mm. Once the local temperature () reaches 55 ℃, the boundary condition switches to cooling, i.e. negative heat flux (). The overall cycle period shortens when gets larger. The total cycle duration decreases with increasing heat flux, indicating the possibility for actuation speed enhancement via optimized thermal dissipation.

## Benchmark comparison


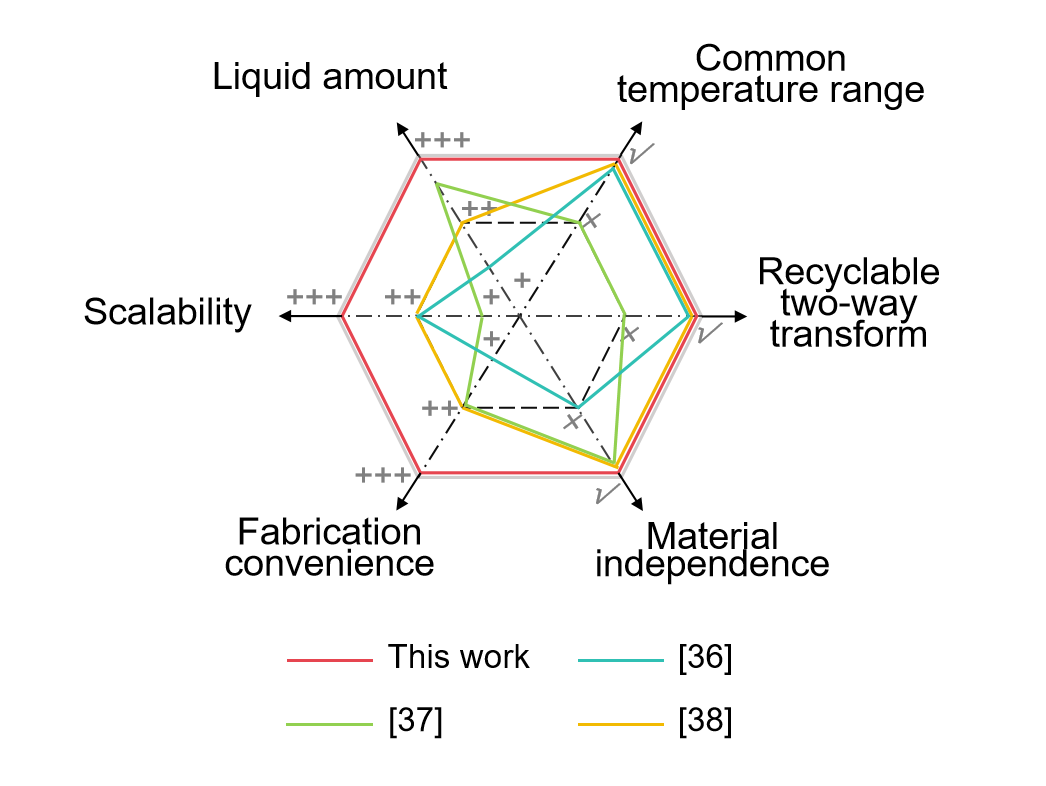


### Fig. S28 Benchmark comparison of representative DLT performance with thermal stimuli

Detailed benchmark comparison of thermally stimulated DLT systems. Each direction corresponds to a specific performance characteristic. The number of “+” symbols qualitatively indicates the degree or extent of a given capability, while “*√*” and “×” denote the presence or absence of the feature, respectively. Reference [36-38] herein is from the main.

## Experimental test rig for DLT of TRV


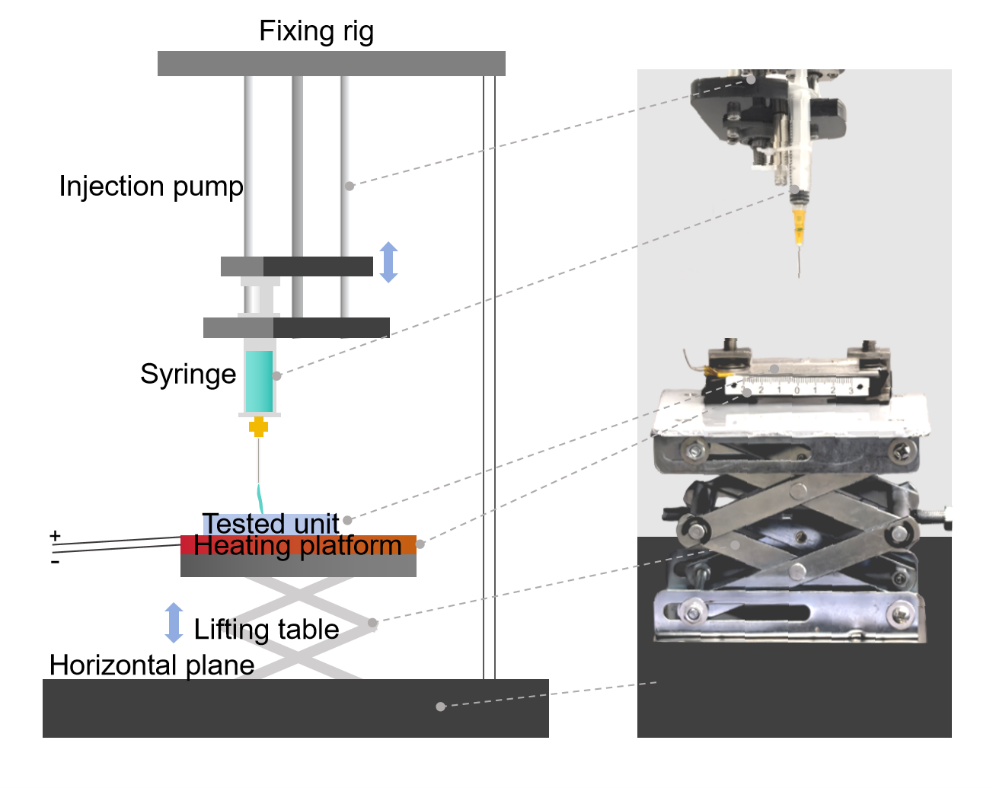


### Fig. S29 Experimental setup and instrumentation used for DLT testing

## References

[1]M. Cao, X. Jin, Y. Peng, C. Yu, K. Li, K. Liu, L. Jiang, Unidirectional wetting properties on multi-bioinspired magnetocontrollable slippery microcilia, Advanced Materials, 29(2017).

[2]S. Ni, C. Pan, T. Hibiki, J. Zhao, Applications of nucleate boiling in renewable energy and thermal management and recent advances in modeling——a review, Energy, 289(2024) 129962.

[3]N. Xu, Z. Liu, X. Yu, J. Gao, H. Chu, Processes, models and the influencing factors for enhanced boiling heat transfer in porous structures, Renewable and Sustainable Energy Reviews, 192(2024) 114244.
